# Supplementary material for: Oropharyngeal Squamous Cell Carcinoma in 390 Patients: Analysis of Clinical and Histological Criteria Which Significantly Impact Outcome
Source: Springer Nature journal article supplement (doi:10.1007/s12105-019-01096-0), 2019-11-18
Supplement: MOESM1 [file 17401478]

Supplemental Table A:

Patient outcome based on stage, subsite and p16 status of oropharyngeal squamous cell carcinomas

| **Stage**  **(average follow-up in years)** | **p16** | **Subsite** | **All patients** | **Alive or dead *with* disease** | **Alive or dead *without* disease** |
| --- | --- | --- | --- | --- | --- |
| **P** | **All sites** | 342 (7.0) | 57 (2.9) | 285 (7.8) |
| **N** | 48 (4.9) | 19 (1.3) | 29 (7.3) |
| **I** | **P** | **All sites** | 164 (7.4) | 19 (3.2) | 145 (7.9) |
| **Base of tongue** | 61 (7.3) | 4 (3.3) | 57 (7.3) |
| **Pharynx** | 1 (5.2) | 0 | 1 (5.2) |
| **Soft palate** | 2 (3.4) | 1 (2.0) | 1 (4.9) |
| **Tonsil** | 100 (7.5) | 14 (3.3) | 86 (8.2) |
| **N** |  | 0 | 0 | 0 |
| **II** | **P** | **All sites** | 94 (7.3) | 12 (3.3) | 82 (7.9) |
| **Base of tongue** | 46 (7.3) | 9 (3.6) | 37 (8.2) |
| **Pharynx** | 2 (7.1) | 0 | 2 (7.1) |
| **Soft palate** | 2 (6.2) | 0 | 2 (6.2) |
| **Tonsil** | 44 (7.3) | 3 (2.5) | 41 (7.6) |
| **N** |  | 0 | 0 | 0 |
| **III** | **P** | **All sites** | 84 (5.9) | 24 (2.5) | 55 (7.3) |
| **Base of tongue** | 47 (5.7) | 16 (2.7) | 31 (7.2) |
| **Pharynx** | 0 | 0 | 0 |
| **Soft palate** | 1 (9.1) | 0 | 1 (9.1) |
| **Tonsil** | 36 (5.8) | 11 (2.1) | 25 (7.4) |
| **N** | **All sites** | 11 (5.8) | 3 (1.8) | 8 (7.3) |
| **Base of tongue** | 2 (3.3) | 0 | 2 (3.3) |
| **Pharynx** | 4 (4.3) | 2 (2.5) | 2 (6.1) |
| **Soft palate** | 1 (8.2) | 0 | 1 (8.2) |
| **Tonsil** | 4 (8.0) | 1 (0.3) | 3 (10.6) |
| **IVA** | **N** | **All sites** | 24 (5.6) | 8 (0.9) | 16 (7.9) |
| **Base of tongue** | 12 (4.7) | 4 (0.8) | 8 (6.6) |
| **Pharynx** | 2 (9.0) | 0 | 2 (9.0) |
| **Soft palate** | 2 (9.6) | 0 | 2 (9.6) |
| **Tonsil** | 8 (5.1) | 4 (0.9) | 4 (9.2) |
| **IVB** | **N** | **All sites** | 13 (2.9) | 8 (1.7) | 5 (5.0) |
| **Base of tongue** | 2 (1.5) | 2 (1.5) | 0 |
| **Pharynx** | 3 (2.3) | 2 (0.6) | 1 (5.9) |
| **Soft palate** | 0 | 0 | 0 |
| **Tonsil** | 8 (3.5) | 4 (2.3) | 4 (4.7) |

P, positive; N, negative
